# THE AMERICAN JOURNAL OF PSYCHIATRY

---

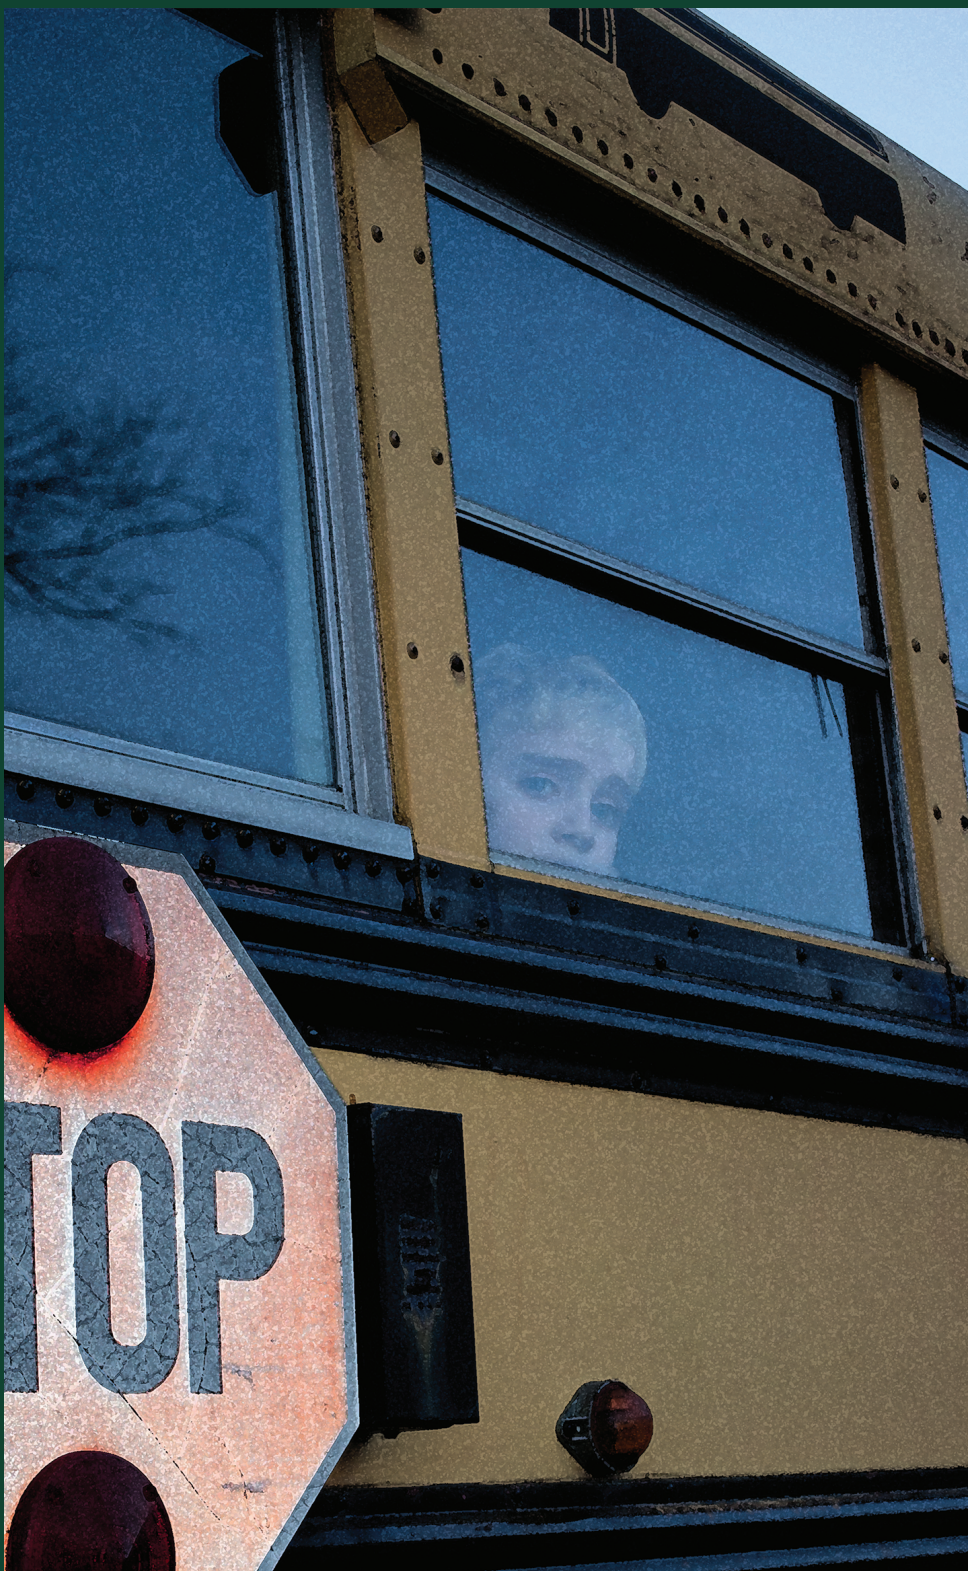

◀ **Childhood Separation Anxiety and the Pathogenesis and Treatment of Adult Anxiety**

Barbara Milrod, M.D., et al. 34

**A Double-Blind Randomized Controlled Trial of Augmentation and Switch Strategies for Refractory Social Anxiety Disorder**

Mark H. Pollack, M.D., et al. 44

**Short-Term Use of Serotonin Reuptake Inhibitors and Risk of Upper Gastrointestinal Bleeding**

Yen-Po Wang, M.D., et al. 54

**A Randomized Controlled Trial of Psychoanalytic Psychotherapy or Cognitive-Behavioral Therapy for Bulimia Nervosa**

Stig Poulsen, Ph.D., et al. 109

**January 2014**

**Volume 171 • Number 1**

---

Official Journal of the  
AMERICAN PSYCHIATRIC ASSOCIATION

---

[ajp.psychiatryonline.org](http://ajp.psychiatryonline.org)
