# THE AMERICAN JOURNAL OF- PSYCHIATRY

## En este número

A30

### Perspectivas

#### Editoriales

- 1 Tratamiento de pacientes con ansiedad social que no responden: “De vuelta al futuro” con las benzodiacepinas**  
Peter Roy-Byrne [Audio](#)
- 5 Saber lo que vemos, o cómo la muestra determina lo que se observa**  
Young Shin Kim
- 9 Poniendo en la mira el desarrollo cognitivo temprano en esquizofrenia**  
Dwight Dickinson
- 13 Psicoanálisis frente a terapia cognitivo-conductual para la bulimia nervosa: La especificidad de los tratamientos psicológicos**  
Steven D. Hollon y G. Terence Wilson

#### Comentario

- 17 Continúa la preocupación sobre seguridad cardíaca del citalopram en dosis superiores a 40 mg/día**  
Steven T. Bird, Victor Crensil, Robert Temple, Simone Pinheiro, Dorothy Demczar, y Marc Stone [Guías clínicas](#)
- 20 La seguridad del citalopram en dosis altas**  
Kara Zivin, Paul N. Pfeiffer, Amy S.B. Bohnert, Dara Ganoczy, Frederic C. Blow, Brahmajee K. Nallamothu, y Helen C. Kales [Guías clínicas](#)

#### Introspección

- 23 Psiquiatras tipo Allen Ginsberg**  
Stevan Weine

#### Conferencia de Caso Clínico

- 25 Esquizofrenia complicada por el virus de la hepatitis C crónica y la encefalopatía hepática**  
Mark Viron, Adam Philip Stern, y Matcheri S. Keshavan [Audio](#)

#### Imágenes en Psiquiatría

- 32 Preocupación por la heredabilidad de las enfermedades mentales graves: Un interludio no tan extraño**  
Gregory Costain

## Resúmenes y Reseñas

- 34 Ansiedad por separación en la infancia y la patogénesis y tratamiento de la ansiedad en la edad adulta**  
Barbara Milrod, John C. Markowitz, Andrew J. Gerber, Jill Cyranowski, Margaret Altemus, Theodore Shapiro, Myron Hofer, y Charles Glatt [Audio](#) [Guías clínicas](#)

## Nuevas Investigaciones

### Artículos

- 44 Un ensayo doble-ciego, aleatorizado y controlado sobre las estrategias de aumento y de cambio de medicamentos para el trastorno de ansiedad social refractaria**  
Mark H. Pollack, Michael Van Ameringen, Naomi M. Simon, John W. Worthington, Elizabeth A. Hoge, Aparna Keshaviah, y Murray B. Stein [Audio](#) [Guías clínicas](#) [EMC](#) [Editorial](#)
- 54 Uso de inhibidores de la recaptación de serotonina y riesgo de hemorragia gastrointestinal alta**  
Yen-Po Wang, Yung-Tai Chen, Chia-Fen Tsai, Szu-Yuan Li, Jiing-Chyuan Luo, Shuu-Jiun Wang, Chao-Hsiun Tang, Chia-Jen Liu, Han-Chieh Lin, Fa-Yauh Lee, Full-Young Chang, y Ching-Liang Lu [Audio](#) [Guías clínicas](#)
- 62 Menor expresión genética para la subunidad del canal de potasio KCNS3 en las neuronas que contienen parvalbúmina en la corteza prefrontal en esquizofrenia**  
Danko Georgiev, Dominique Arion, John F. Enwright, Mitsuru Kikuchi, Yoshio Minabe, John P. Corradi, David A. Lewis, y Takanori Hashimoto
- 72 Una exploración del genoma para identificar los sitios (loci) compartidos por los trastornos del espectro autista y las deficiencias en el lenguaje**  
Christopher W. Bartlett, Liping Hou, Judy F. Flax, Abby Hare, Soo Yeon Cheong, Zena Fermano, Barbie Zimmerman-Bier, Charles Cartwright, Marco A. Azaro, Steven Buyske, y Linda M. Brzustowicz [Editorial](#)
- 82 Los correlatos neuronales de la habituación anómala a imágenes emocionales negativas en pacientes con trastorno límite de la personalidad y con trastorno de personalidad por evitación**  
Harold W. Koenigsberg, Bryan T. Denny, Jin Fan, Xun Liu, Stephanie Guerreri, Sarah Jo Mayson, Liza Rimsky, Antonia S. New, Marianne Goodman, y Larry J. Siever [EMC](#)

**91 Deterioro neuropsicológico en esquizofrenia desde el período premórbido hasta el post-inicial: Evidencia de un estudio longitudinal representativo de la población**

Madeline H. Meier, Avshalom Caspi, Abraham Reichenberg, Richard S.E. Keefe, Helen L. Fisher, Honalee Harrington, Renate Houts, Richie Poulton, y Terrie E. Moffitt **Audio** **Editorial**

**102 La personalidad de los pacientes y la reacción de los terapeutas: Una investigación empírica**

Antonello Colli, Annalisa Tanzilli, Giancarlo Dimaggio, y Vittorio Lingiardi **EMC**

**109 Un ensayo aleatorizado controlado de psicoterapia psicoanalítica o terapia cognitivo-conductual para la bulimia nerviosa**

Stig Poulsen, Susanne Lunn, Sarah I. F. Daniel, Sofie Folke, Birgit Bork Mathiesen, Hannah Katznelson, y Christopher G. Fairburn **Audio** **Guías clínicas** **Editorial**

## Comunicados y Actualizaciones

### Cartas al Editor

- 117** Difusión del tratamiento con prazosina para el trastorno por estrés postraumático  
¿Dosis altas de antidepresivos recetadas sin riesgo?  
Dosis adecuadas de los antipsicóticos de segunda generación para establecer la resistencia al tratamiento en esquizofrenia  
La metformina y el riesgo de la enfermedad de Alzheimer

### Reseñas Bibliográficas

- 121** Learning to Listen: A Life Caring for Children [Aprendiendo a escuchar: Una vida cuidando/ queriendo a los niños]  
The Nature of Healing: The Modern Practice of Medicine [La naturaleza de curarse: La práctica moderna de la medicina]  
Psycho-Oncology [Psico-oncología]  
Cognitive-Behavior Therapy for Children and Adolescents [Terapia cognitivo-conductual para niños y adolescentes]

### 125 Libros Recibidos

#### Otros Temas de Interés

- 126** Declaraciones de los Editores del *American Journal of Psychiatry*  
**127** Educación Médica Continuada  
**A23** Directivos de la American Psychiatric Association  
**A17** Calendario  
**A21** Contenidos del *British Journal of Psychiatry*  
**A22** Contenidos del *Shanghai Archives of Psychiatry*

### Cubierta

Las psicoterapias que se centran en la ansiedad por separación y las relaciones pueden ser útiles para los adultos que en su infancia sufrieron ansiedad por separación. La ansiedad por separación que no ha sido tratada disminuye los efectos tanto de la medicación como de la psicoterapia. Como Milrod et al. (p. 0000) apuntan en su reseña, es posible que los pacientes no informen de su ansiedad por separación, ya que esto ocurre en familias en las que se puede considerar como una conducta normal. Diseño de la cubierta de Wendy Taylor.

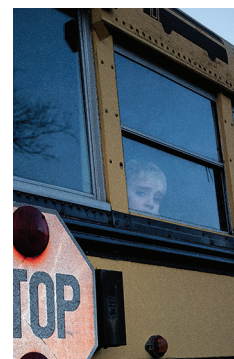

#### Audio

artículo en AJP Audio: archivo .mp3 descargable de [ajp.psychiatryonline.org](http://ajp.psychiatryonline.org)

#### Guías clínicas

este artículo ofrece guías clínicas (ver página "En este Número" o al final del artículo)

#### EMC

existe un curso en línea que cubre los contenidos de este artículo para los suscriptores del programa de cursos de EMC del AJP

#### Editorial

este artículo se discute en uno de los editoriales de este número

La Tabla de Contenidos de Este Número Está Disponible en Español

(This issue's Table of Contents is available in Spanish)

Presented in collaboration with the Office of Global Health, UMDNJ-Robert Wood Johnson Medical School

Translation courtesy of

Sergi Casals, M.A.

Garuna, Medellín, Colombia ([www.garunaeditors.com](http://www.garunaeditors.com))

Carlos Lopez Jaramillo, M.D.

Universidad de Antioquia, Medellín, Colombia

Javier I. Escobar, M.D., M.Sc.

UMDNJ-Robert Wood Johnson Medical School

Consulte *The American Journal of Psychiatry* en línea en [ajp.psychiatryonline.org](http://ajp.psychiatryonline.org)

**NEW**

Also Included: Translations of selected abstracts!

(Support for this effort provided by AstraZeneca-Colombia.)

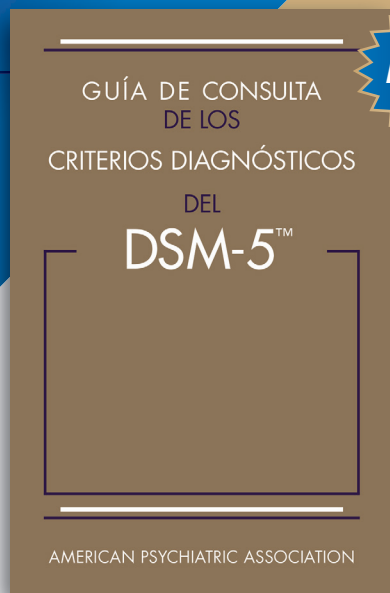

**Nuevo!**

## Guía de consulta de los criterios diagnósticos del DSM-5™

**Spanish Edition of the Desk Reference to the Diagnostic Criteria From DSM-5™**

American Psychiatric Association

La Guía de consulta de los criterios diagnósticos del DSM-5™ es una ayuda concisa y asequible para la referencia psiquiátrica fundamental, el DSM-5™. Incluye la clasificación diagnóstica completa revisada, así como todos los criterios diagnósticos del DSM-5™ en un formato fácil de utilizar. Esta cómoda referencia proporciona un acceso rápido a la información esencial para emitir un diagnóstico. Diseñado como complemento del DSM-5™, esta cómoda guía ayudará a los profesionales de la salud mental a incorporar los criterios diagnósticos del DSM-5™ en sus diagnósticos.

El Manual diagnóstico y estadístico de los trastornos mentales es la máxima referencia autorizada para la práctica clínica en el campo de la salud mental. Los cambios estructurales y diagnósticos de la quinta edición son un material que todos los clínicos "deben conocer". La Guía de consulta de los criterios diagnósticos del DSM-5™ condensa la información diagnóstica actualizada esencial de este manual para ofrecer a los clínicos un recurso inestimable para diagnosticar con eficacia los trastornos mentales, desde el de mayor prevalencia al menos frecuente.

2014 • 490 pages • ISBN 978-0-89042-551-0 • Paperback • \$69.00 • Item #2551

*También disponible en Español*

### Aplicación para celular de los Criterios Diagnósticos del DSM-5™

La Aplicación Móvil de Criterios Diagnósticos DSM-5™ proporciona a los profesionales, investigadores y estudiantes de la salud mental un rápido acceso a códigos y criterios vitales de DSM para que puedan integrar por completo los nuevos datos en su práctica y sus estudios. Los usuarios tienen acceso completo fuera de línea a todos los conjuntos de criterios, además de acceso en línea a vídeos, comentarios y recursos de apoyo. Sus poderosas herramientas de personalización y de búsqueda ayudan y mejoran la valoración de las presentaciones de los síntomas en diversos entornos clínicos y administrativos.

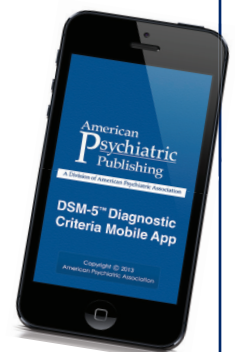

Ahora disponible para dispositivos iOS y Android.

### Ansiedad por separación en la infancia y la patogénesis y tratamiento de la ansiedad en la edad adulta

Barbara Milrod, M.D.  
John C. Markowitz, M.D.  
Andrew J. Gerber, M.D., Ph.D.  
Jill Cyranowski, Ph.D.  
Margaret Altemus, M.D.  
Theodore Shapiro, M.D.  
Myron Hofer, M.D.  
Charles Glatt, M.D.

El trastorno clínicamente significativo de ansiedad por separación en la infancia conlleva trastornos de pánico y otros trastornos de ansiedad en la edad adulta. El modelo predominante de fisiopatología de los trastornos de ansiedad, que enfatiza los déficits de extinción de

respuestas condicionadas por el miedo, no considera a plenitud el papel de la ansiedad por separación. Los apegos patológicos en la infancia temprana tienen consecuencias de largo alcance para la habilidad del adulto de experimentar e internalizar relaciones positivas que le permitan desarrollar las capacidades mentales para el auto-consuelo, la tolerancia a la ansiedad, la modulación del afecto y la individuación. El fenómeno de la ansiedad por separación, originalmente identificado en la investigación sobre el apego, está respaldado por el modelo animal, neuroimágenes y estudios de genética. Se propone un rol de la oxitocina. Los adultos, acostumbrados a su ansiedad, a menudo no

ven la ansiedad por separación como un problema, pero aquellos que desarrollan trastornos del ánimo y de ansiedad responden peor tanto a las intervenciones farmacológicas como a las psicoterapéuticas. Esta peor respuesta puede reflejar la dificultad de los pacientes para formar y mantener apegos, incluyendo las relaciones terapéuticas. Las psicoterapias que se centran en las relaciones y la ansiedad por separación pueden beneficiar a los pacientes con ansiedad por separación, utilizando la relación dicotómica terapeuta-paciente para recapturar y comprender mejor los elementos de anteriores relaciones paterno-filiales patológicas.

(*Am J Psychiatry* 2014; 171:34-43)

## Artículos

### Un ensayo doble-ciego, aleatorizado y controlado sobre las estrategias de aumento y de cambio de medicamentos para el trastorno de ansiedad social refractaria

Mark H. Pollack, M.D.  
Michael Van Ameringen, M.D.  
Naomi M. Simon, M.D., M.Sc.  
John W. Worthington, M.D.  
Elizabeth A. Hoge, M.D.  
Aparna Keshaviah, Sc.M.  
Murray B. Stein, M.D., M.P.H.

**Objetivo:** La mayoría de los pacientes siguen presentando síntomas después de la intervención inicial con tratamientos aprobados para el trastorno de ansiedad social generalizada. En este ensayo aleatorizado y controlado se obtienen datos de forma sistemática y prospectiva sobre los beneficios relativos de las farmacoterapias “que siguen” para mejorar los resultados en las personas con trastorno de ansiedad social generalizada que siguen presentando síntomas después del tratamiento inicial.

**Método:** En este ensayo controlado, aleatorizado, llevado a cabo durante 12 semanas y en tres sitios distintos, se compararon los beneficios relativos de tres estrategias para pacientes que siguen

presentando síntomas (puntaje en la Escala de ansiedad social de Liebowitz [LSAS], >50) después de un ensayo de 10 semanas únicamente con sertralina: la adición de hasta 3,0 mg/día de clonazepam (sertralina más clonazepam), un cambio a venlafaxina (hasta 225 mg/día), o el tratamiento prolongado con sertralina añadiéndole placebo (sertralina más placebo).

**Resultados:** En total 397 participantes recibieron por lo menos una dosis de sertralina; 181 de los pacientes que no respondieron (puntaje en la escala LSAS, >50) a la semana 10, fueron escogidos aleatoriamente para tomar sertralina y clonazepam, para cambiar a venlafaxina, o para tomar sertralina y placebo. En conjunto, el 21% de los pacientes lograron la remisión (puntaje LSAS, ≤30) al final del estudio, y el 27% de los pacientes seleccionados aleatoriamente para el tratamiento con sertralina y clonazepam lograron la remisión, en comparación con los que recibieron el tratamiento de sertralina y placebo (17%) o de venlafaxina (19%), pero las diferencias no fueron significativas. La

combinación de sertralina y clonazepam se asoció, de acuerdo con la escala LSAS, con una disminución significativa de la severidad ( $p=0,020$ ) y la incapacidad ( $p=0,0028$ ), en comparación con la combinación de sertralina y placebo; no se observaron diferencias significativas en estos parámetros entre la venlafaxina y la combinación de sertralina y placebo ni entre la venlafaxina y la combinación de sertralina y clonazepam. En análisis complementarios, la tasa de respuesta global (puntaje LSAS, ≤50) fue del 46%, incluyendo una proporción significativamente mayor de pacientes en el grupo de sertralina y clonazepam (56%) comparado con los pacientes que respondieron del grupo de sertralina y placebo (36%;  $p=0,027$ ); las diferencias no fueron significativas entre venlafaxina (46%) y sertralina más placebo ni entre venlafaxina y sertralina más clonazepam.

**Conclusiones:** Los hallazgos sugieren que la estrategia de aumentar el clonazepam ofrece beneficios relativos para los pacientes que no responden a la sertralina en el trastorno de ansiedad social.

(*Am J Psychiatry* 2014; 171:44-53)

## Uso a corto plazo de inhibidores de la recaptación de serotonina y riesgo de hemorragia gastrointestinal alta

Yen-Po Wang, M.D.  
Yung-Tai Chen, M.D.  
Chia-Fen Tsai, M.D.  
Szu-Yuan Li, M.D.  
Jiing-Chyuan Luo, M.D.  
Shuu-Jiun Wang, M.D.  
Chao-Hsiun Tang, Ph.D.  
Chia-Jen Liu, M.D.  
Han-Chieh Lin, M.D.  
Fa-Yauh Lee, M.D.  
Full-Young Chang, M.D.  
Ching-Liang Lu, M.D.

**Objetivo:** La asociación entre los inhibidores selectivos de la recaptación de serotonina (ISRSs) y el riesgo de hemorragia gastrointestinal alta sigue siendo controvertida. En estudios anteriores, por lo general, este tema se ha evaluado por aproximadamente 3 meses, aunque la inhibición mediada por ISRSs de las concentraciones de serotonina de las plaquetas se produce en los primeros

7-14 días. Los autores utilizaron un diseño de casos cruzados para explorar el riesgo de hemorragia gastrointestinal alta después de la exposición a corto plazo a ISRSs.

**Método:** Se recuperaron los historiales de los pacientes psiquiátricos internos con hemorragia gastrointestinal alta de la base de datos de *Taiwan National Health Insurance* (1998-2009). Se compararon las tasas de uso de antidepresivos en períodos de estudio y de control, en intervalos de 7, 14 y 28 días. Se emplearon las razones de posibilidades (*odds ratios*, OR) individualmente ajustadas, obtenidas de un modelo de regresión logística condicional, para determinar la asociación entre el uso de ISRSs y hemorragia gastrointestinal alta.

**Resultados:** En total se registraron 5377 pacientes con hemorragia gastrointestinal alta. La razón de posibilidades ajustada para el riesgo de hemorragia gastrointestinal alta posterior a la ex-

posición a ISRSs fue 1,67 (95% CI=1,23–2,26) para el intervalo de 7 días, 1,84 (95% CI=1,42–2,40) para el intervalo de 14 días y 1,67 (95% CI=1,34–2,08) para el intervalo de 28 días. Los ISRSs con afinidad alta e intermedia, pero no baja, con el transportador de serotonina se asociaron con hemorragia gastrointestinal alta. Se observó un riesgo elevado de hemorragia gastrointestinal alta después de la exposición a ISRSs en pacientes hombres, pero no en mujeres.

**Conclusiones:** El uso de ISRSs a corto plazo (7–28 días) está significativamente asociado con hemorragia gastrointestinal alta. Puede haber diferencias de género en relación con el uso de ISRSs y hemorragia gastrointestinal alta. Los médicos deben hacer un seguimiento cuidadoso de las señales de hemorragia gastrointestinal alta, incluso después de la exposición a corto plazo a ISRSs, igual que se hace con las medicaciones antiinflamatorias sin esteroides y la aspirina.

(*Am J Psychiatry* 2014; 171:54–61)

## Menor expresión genética para la subunidad del canal de potasio KCNS3 en las neuronas que contienen parvalbúmina en la corteza prefrontal en esquizofrenia

Danko Georgiev, M.D., Ph.D.  
Dominique Arion, Ph.D.  
John F. Enwright, Ph.D.  
Mitsuru Kikuchi, M.D., Ph.D.  
Yoshio Minabe, M.D., Ph.D.  
John P. Corradi, Ph.D.  
David A. Lewis, M.D.  
Takanori Hashimoto, M.D., Ph.D.

**Objetivo:** En esquizofrenia, las alteraciones en los marcadores de neurotransmisión cortical de GABA son prominentes en las neuronas que contienen parvalbúmina. Las neuronas con parvalbúmina expresan selectivamente el gen KCNS3, que codifica la subunidad *alpha* del canal de potasio Kv9.3. Las subunidades de Kv9.3 están presentes en los canales de potasio con entrada de voltaje que contribuyen a la detección precisa de inputs sinápticos excitatorios coincidentes con las neuronas que expresan parvalbúmina. Este rasgo distintivo de las neuronas que expresan parvalbúmina parece ser importante para la sincronización de las

redes neuronales corticales en las oscilaciones *gamma*. Debido a que se cree que las oscilaciones *gamma* corticales prefrontales deficientes subyacen a los déficits cognitivos en esquizofrenia, los autores investigaron si los niveles de ARNm del gen KCNS3 están alterados en la corteza prefrontal de los sujetos con esquizofrenia.

**Método:** Se evaluó la expresión del ARNm del gen KCNS3 por medio de hibridación in situ en 22 pares equivalentes de sujetos con esquizofrenia y controles y por medio de análisis de *microarrays* de muestras agrupadas de neuronas diseccionadas individualmente que fueron etiquetadas con aglutinina *Vicia villosa* (VVA), un marcador selectivo de neuronas con parvalbúmina, en una cohorte aparte de 14 pares. Los efectos de los tratamientos con antipsicóticos crónicos en la expresión del gen KCNS3 se evaluaron en la corteza prefrontal de monos expuestos a antipsicóticos.

**Resultados:** Con la hibridación in situ, los niveles de ARNm en el gen KCNS3 fueron el 23% inferiores en los sujetos con esquizofrenia. A nivel celular, tanto la densidad neuronal del ARNm del gen KCNS3 como el nivel de ARNm del gen KCNS3 por neurona fueron significativamente inferiores. Con el análisis por *microarrays*, los niveles de ARNm del gen KCNS3 fueron el 40% inferiores en las neuronas etiquetadas con VVA de los sujetos con esquizofrenia. Los niveles de ARNm del gen KCNS3 no sufrieron alteraciones en los monos expuestos a antipsicóticos.

**Conclusiones:** Estos hallazgos revelan una menor expresión del gen KCNS3 en las neuronas corticales prefrontales con parvalbúmina en esquizofrenia, y ofrecen una base molecular para la detección comprometida de inputs sinápticos coincidentes con neuronas con parvalbúmina, que podría contribuir a las oscilaciones *gamma* alteradas y al déficit cognitivo en esquizofrenia.

(*Am J Psychiatry* 2014; 171:62–71)

## Una exploración del genoma para identificar los sitios (loci) compartidos por trastornos del espectro autista y deficiencias del lenguaje

Christopher W. Bartlett, Ph.D.  
Liping Hou, Ph.D.  
Judy F. Flax, Ph.D.  
Abby Hare, B.S.  
Soo Yeon Cheong, Ph.D.  
Zena Fermano, M.A.  
Barbie Zimmerman-Bier, M.D.  
Charles Cartwright, M.D.  
Marco A. Azaro, Ph.D.  
Steven Buyske, Ph.D.  
Linda M. Brzustowicz, M.D.

**Objetivo:** Los autores realizaron un estudio de ligamiento genético de familias que tienen tanto el trastorno del espectro autista (TEA) como probandos con trastornos del lenguaje, para encontrar los *loci* comunes del deterioro de la comunicación. La hipótesis era que estas familias tienen una alta carga genética

para las deficiencias de la capacidad lingüística, y eso influencia los déficits de lenguaje y de comunicación de los miembros de las familias con TEA. La definición comprensiva de fenotipos del comportamiento en las familias permitió además realizar análisis de ligamiento de medidas cuantitativas, incluyendo variación normal, subclínica y trastornada, en todos los miembros de las familias para los tres dominios de síntomas generales del autismo: comportamientos sociales, comunicativos y compulsivos.

**Método:** El análisis de ligamiento primario clasificó como "afectadas" a las personas con TEA o con deficiencias específicas del lenguaje. El análisis de ligamiento secundario consistió en métricas cuantitativas de comportamientos asociados con el autismo, capturando desde la variación normal hasta la severa, aplicadas a todos los miembros de la familia.

**Resultados:** Se estableció ligamiento de los fenotipos del lenguaje a dos *loci* cromosómicos nuevos, 15q23–26 y 16p12. El análisis secundario de variación cuantitativa normal y trastornada en comportamientos sociales y compulsivos estableció ligamiento a dos *loci* para comportamientos sociales (al 14q y al 15q) y a un locus para comportamientos repetitivos (al 13q).

**Conclusiones:** Estos datos indican una etiología compartida entre los TEA y las deficiencias específicas del lenguaje en dos nuevos *loci*. Adicionalmente, los fenotipos no lingüísticos basados en rasgos de indiferencia social y personalidad rígida mostraron evidencia convincente de ligamiento en este grupo de estudio. Es necesario seguir haciendo cartografía genética en estos *loci*.

(*Am J Psychiatry* 2014; 171:72–81)

## Los correlatos neuronales de la habituación anómala a imágenes emocionales negativas en pacientes con trastorno límite de la personalidad y con trastorno de la personalidad por evitación

Harold W. Koenigsberg, M.D.  
Bryan T. Denny, Ph.D.  
Jin Fan, Ph.D.  
Xun Liu, Ph.D.  
Stephanie Guerreri  
Sarah Jo Mayson  
Liza Rimsky  
Antonia S. New, M.D.  
Marianne Goodman, M.D.  
Larry J. Siever, M.D.

**Objetivo:** La reactividad emocional extrema es un rasgo definitorio del trastorno límite de la personalidad, pero es poco lo que se sabe sobre los mecanismos neuronales-comportamentales subyacentes a esta inestabilidad afectiva. Un posible factor contribuyente es la disminución de la capacidad de activar el mecanismo de habituación emocional. Para evaluar esta hipótesis, los autores examinaron correlatos comportamentales y neuronales de la habituación en pacientes con trastorno límite, sujetos sanos de comparación y un grupo de comparación psicopatológico de pacien-

tes con trastorno de la personalidad por evitación.

**Método:** Durante la resonancia magnética funcional (fMRI), a los pacientes con trastorno límite, los sujetos sanos y los que tenían trastorno de la personalidad por evitación se les mostraron imágenes nuevas y repetidas, y ellos proporcionaron evaluaciones de valencias en cada presentación. Se compararon los mapas estadísticos paramétricos de los contrastes de activación que hubo mientras los sujetos veían imágenes negativas nuevas vs. repetidas en los tres grupos. Se empleó el análisis de interacción psicosocial para examinar las diferencias en la conectividad funcional entre los grupos.

**Resultados:** A diferencia de los sujetos sanos, ni los sujetos con trastorno límite ni los sujetos con trastorno de la personalidad por evitación exhibieron mayor actividad en la corteza cingulada dorsal anterior cuando veían imágenes repetidas en comparación con imágenes nuevas. Esta falta de aumento de actividad cingulada dorsal anterior se asoció con una mayor inestabilidad

afectiva en los pacientes con trastorno límite de la personalidad. Además, en los pacientes con trastorno límite o por evitación se observó menor aumento de la conectividad funcional entre la ínsula y la amígdala que en los sujetos sanos y, a diferencia de los sujetos sanos, no mostraron habituación en las evaluaciones de la intensidad emocional de las imágenes. Los pacientes con trastorno límite se diferenciaron de los pacientes con trastorno por evitación en la conectividad funcional entre la ínsula y la corteza cingulada ventral anterior durante la habituación.

**Conclusiones:** A diferencia de los sujetos sanos, los pacientes con trastorno límite de la personalidad no logran habituarse a las imágenes negativas, y se diferencian tanto de los sujetos sanos como de los pacientes con trastorno de la personalidad por evitación en la actividad neuronal durante la habituación. El hecho de no lograr activar de forma efectiva los procesos de habituación emocional puede contribuir a la inestabilidad afectiva en los pacientes con trastorno límite de la personalidad.

(*Am J Psychiatry* 2014; 171:82–90)

## Deterioro neuropsicológico en esquizofrenia desde el período premórbido hasta el post-inicial: Evidencia de un estudio longitudinal representativo de la población

Madeline H. Meier, Ph.D.  
Avshalom Caspi, Ph.D.  
Abraham Reichenberg, Ph.D.  
Richard S.E. Keefe, Ph.D.  
Helen L. Fisher, Ph.D.  
HonaLee Harrington, B.S.  
Renate Houts, Ph.D.  
Richie Poulton, Ph.D.  
Terrie E. Moffitt, Ph.D.

**Objetivo:** A pesar de la extendida creencia que el deterioro neuropsicológico es una característica esencial de la evolución del estado premórbido a la forma crónica de la esquizofrenia, pocos estudios longitudinales han examinado los cambios en el funcionamiento neuropsicológico desde antes hasta después del inicio de la enfermedad. Los autores examinaron si el deterioro neuropsicológico es exclusivo de la esquizofrenia, si es generalizado o está confinado a ciertas funciones mentales, y si las personas con esquizofrenia también tienen problemas cognitivos en la vida diaria.

**Método:** Los participantes eran miembros de una cohorte representativa de 1.037 individuos nacidos en Dunedin, Nueva Zelanda, en 1972 y 1973 y se les hizo un seguimiento prospectivo hasta los 38 años, con una retención del 95%. Se evaluó su coeficiente intelectual (CI) y funciones neuropsicológicas específicas cuando tenían 7, 9, 11 y 13 años, y de nuevo a los 38. Los informantes también reportaron sus problemas cognitivos a los 38 años.

**Resultados:** Las personas con esquizofrenia tuvieron deterioro del CI y de varias funciones mentales, particularmente las relacionadas con la velocidad de procesamiento, el aprendizaje, la función ejecutiva y la función motora. Sin embargo, hubo poca evidencia del deterioro de habilidades verbales o de la memoria diferida, y la evolución de los déficits en esquizofrenia también fue distinta en diferentes funciones mentales. Los déficits de velocidad de procesamiento aumentaron gradualmente desde la infancia hasta los primeros

años de la adolescencia, mientras que los déficits verbales aparecieron temprano pero permanecieron estáticos desde entonces. El deterioro neuropsicológico se dio específicamente en esquizofrenia, ya que no se encontró evidencia de deterioro entre los individuos con depresión persistente, los niños con deterioro cognitivo leve, los individuos apareados con factores de riesgo de esquizofrenia en la infancia y los individuos psiquiátricamente sanos. Los informantes también observaron más problemas cognitivos en los individuos con esquizofrenia.

**Conclusiones:** Existe deterioro neuropsicológico substancial en la esquizofrenia desde el período premórbido hasta el período post-inicial, pero el alcance y la evolución del deterioro varía en diferentes funciones mentales. Los hallazgos parecen indicar que diferentes mecanismos fisiopatológicos pueden subyacer a los déficits en diferentes funciones mentales.

(*Am J Psychiatry* 2014; 171:91–101)

## La personalidad de los pacientes y la reacción de los terapeutas: Una investigación empírica

Antonello Colli, Ph.D.  
Annalisa Tanzilli, Ph.D.  
Giancarlo Dimaggio, M.D.  
Vittorio Lingiardi, M.D.

**Objetivo:** El objetivo de este estudio fue examinar la relación entre las reacciones emocionales de los terapeutas y los trastornos de personalidad y el nivel de funcionamiento psicológico de los pacientes.

**Método:** Una muestra nacional aleatoria de psiquiatras y psicólogos clínicos (N = 203) completaron el *Therapist Response Questionnaire* [Cuestionario de Reacciones del Terapeuta] para identificar los patrones de reacción emocional de los terapeutas y el *Shedler-Western Assessment Procedure–200* [Proceso de Evaluación de Shedler-Western-200] para evaluar los trastornos de la per-

sonalidad y el nivel de funcionamiento psicológico de un paciente seleccionado aleatoriamente que estuviera actualmente a su cargo y con el que hubieran trabajado como mínimo durante ocho sesiones y como máximo durante 6 meses (una sesión semanal).

**Resultados:** Hubo varias relaciones significativas entre las reacciones de los terapeutas y la patología de personalidad de los pacientes. Los trastornos paranoide y antisocial de la personalidad se asociaron con la contratransferencia crítica/maltratada, y el trastorno límite de la personalidad se relacionó con la contratransferencia inútil/inadecuada, abrumada/ desorganizada y especial/sobreinvolucrada. La contratransferencia 'desapegada' (*disengaged*) se asoció con los trastornos esquizotípico y narcisista de la personalidad y negativamente con los trastornos histriónico y por de-

pendencia de la personalidad. La personalidad esquizoide se relacionó con reacciones inútiles/inadecuadas. La contratransferencia positiva se asoció con el trastorno de personalidad por evitación, que de igual modo se relacionó con las reacciones parental/protectora y especial/sobreinvolucrada del terapeuta. El trastorno obsesivo-compulsivo de la personalidad se asoció negativamente con las reacciones especiales/sobreinvolucradas del terapeuta. En general, las reacciones de los terapeutas se caracterizaron por sentimientos negativos más fuertes cuando trabajaban con pacientes cuyo funcionamiento era inferior.

**Conclusiones:** Las patologías específicas de los pacientes están asociadas con reacciones emocionales consistentes, lo que indica que los clínicos pueden hacer uso diagnóstico y terapéutico de sus reacciones hacia los pacientes.

(*Am J Psychiatry* 2014; 171:102–108)

## Un ensayo aleatorizado controlado de psicoterapia psicoanalítica o terapia cognitivo-conductual para la bulimia nerviosa

Stig Poulsen, Ph.D.  
Susanne Lunn, M.Sc.  
Sarah I. F. Daniel, Ph.D.  
Sofie Folke, M.Sc.  
Birgit Bork Mathiesen, Ph.D.  
Hannah Katznelson, M.Sc.  
Christopher G. Fairburn,  
F.Med.Sci., F.R.C.Psych.

**Objetivo:** Los autores compararon la psicoterapia psicoanalítica y la terapia cognitivo-conductual (TCC) en el tratamiento de la bulimia nerviosa.

**Método:** Se llevó a cabo un ensayo aleatorizado controlado en el que 70 pacientes con bulimia nerviosa recibieron o bien 2 años de psicoterapia psicoanalítica semanal, o bien 20 sesiones de TCC en el transcurso de 5 meses. La principal medida para obtener el resul-

tado fue la entrevista Eating Disorder Examination [Examen de trastornos alimenticios], que se administró de manera ciega al tratamiento al inicio del estudio, después de 5 meses y después de 2 años. Los análisis de los resultados primarios se llevaron a cabo utilizando el análisis de regresión logística.

**Resultados:** Ambos tratamientos comportaron una mejora, pero se observó una marcada diferencia entre la TCC y la psicoterapia psicoanalítica. Después de 5 meses, el 42% de los pacientes en TCC (N=36) y el 6% de los pacientes en psicoterapia psicoanalítica (N=34) habían dejado de comer compulsivamente (los atracones) y de purgarse (odds ratio=13,40, intervalo de confianza [IC] 95% =2,45-73,42; p<0,01). A los 2 años, el 44% del grupo de la TCC y el 15% del grupo de la psicoterapia psico-

analítica habían superado los atracones y las purgas (odds ratio=4,34; IC 95% =1,33-14,21; p=0,02). Al final de ambos tratamientos se observaron mejoras substanciales en las características de los trastornos alimenticios y en la psicopatología en general, pero por lo regular esos cambios se dieron antes con la TCC.

**Conclusiones:** A pesar de la marcada disparidad en el número de sesiones de tratamiento y en la duración del mismo, la TCC fue más efectiva que la psicoterapia psicoanalítica para superar los atracones y las purgas y en general fue más rápida para aliviar las características de los trastornos alimenticios y la psicopatología general. Los hallazgos ponen de manifiesto la necesidad de desarrollar y evaluar una versión más centrada en los síntomas y más estructurada de la psicoterapia para la bulimia nerviosa.

(*Am J Psychiatry* 2014; 171:109-116)
